# Supplementary material for: Simultaneous preconcentration and fluorescence detection of ATP by a hybrid nanocomposite of magnetic nanoparticles incorporated in mixed metal hydroxide
Source: Royal Society of Chemistry journal article supplement (doi:10.1039/d1ay01593a), 2021-11-25
Supplement: d1ay01593a1.pdf [file d1ay01593a1.pdf]

**Electronic Supporting Information for**

**Simultaneous preconcentration and fluorescence detection of  
ATP by a hybrid nanocomposite of magnetic nanoparticles  
incorporated mixed metal hydroxide**

**Pradthana Sianglam<sup>a</sup>, Kessarín Ngamdee<sup>a,b</sup>, Wittaya Ngeontae<sup>a,b,c\*</sup>**

*<sup>a</sup>Department of Chemistry, Faculty of Science, Khon Kaen University, Khon Kaen 40002, Thailand*

*<sup>b</sup>Department of Chemistry and Center of Excellence for Innovation in Chemistry, Faculty of Science, Khon Kaen University, Khon Kaen 40002, Thailand*

*<sup>c</sup>Research Center for Environmental and Hazardous Substance Management (EHSM), Khon Kaen University, Khon Kaen 40002, Thailand*

Corresponding author: W. Ngeontae

E-mail: [wittayange@kku.ac.th](mailto:wittayange@kku.ac.th)

## 1. Chemicals

ATP was purchased from Sigma-Aldrich (USA). Aluminum chloride ( $\text{AlCl}_3$ ), magnesium chloride ( $\text{MgCl}_2$ ), ammonium hydroxide (28%  $\text{NH}_4\text{OH}$ ) and hydrochloric acid (37%  $\text{HCl}$ ) were received from QRec (New Zealand). Ferrous sulfate ( $\text{FeSO}_4$ ), sodium hydroxide ( $\text{NaOH}$ ), hydrogen peroxide (30%  $\text{H}_2\text{O}_2$ ) and tris(hydroxymethyl)aminomethane were purchased from Carlo Erba Reagents. (Italy). Ferric chloride ( $\text{FeCl}_3$ ) was obtained from Riedel-de Haën (Germany). OPD was received from Sigma (USA). Acetic acid ( $\text{CH}_3\text{COOH}$ ) was purchased from RCI Labscan. All aqueous solutions were prepared from ultrapure water with a specific resistivity of 18.2  $\text{M}\Omega$  cm from a RiOs™ Type I Simplicity 185 system (Millipore water). All reagents were used as received without further purification.

## 2. Instrumentation

Fluorescence spectra were recorded using an RF-6000PC spectrofluorometer (Shimadzu). The absorbance was recorded with an Agilent HP spectrophotometer. The morphology of the MNPs and MNPs@MMH was observed on a dual beam scanning electron microscope/focused ion beam (SEM/FIB) (FEI Helios NanoLab G3 CX Dual Beam, FEI, USA). Fourier transform infrared (FT-IR) spectra were recorded on a TENSOR27 infrared scanner (Bruker, Germany) with a spectral range of 4000 to 500  $\text{cm}^{-1}$ . The magnetic properties were investigated by measuring magnetization (M) versus magnetic field (H) using the vibrating sample magnetometer (VSM) option in a VersaLab instrument (Quantum Design, USA) with a maximum applied field of 10 kOe. X-ray diffraction (XRD) patterns were recorded using an XRD instrument (Model D8 Advance, Bruker AXS, Germany) with  $\text{Cu K}\alpha$  radiation ( $\lambda = 0.1514$  nm) in the  $2\theta$  range of  $10^\circ$  to  $80^\circ$ . The pH values of the solutions were measured with a UB-10 Ultra Basic pH meter (Denver Instrument).

### 3. Synthesis of Fe<sub>3</sub>O<sub>4</sub> magnetic nanoparticles (MNPs)

Fe<sub>3</sub>O<sub>4</sub> magnetic nanoparticles were prepared by coprecipitation of ferric (Fe<sup>3+</sup>) and ferrous (Fe<sup>2+</sup>) ions in alkaline solution. FeCl<sub>3</sub> (1.6200 g) and FeSO<sub>4</sub> (1.3960 g) were dissolved in deoxygenated water, and the mixture was heated to 90°C under vigorous stirring. Then, the NH<sub>4</sub>OH solution was added to the mixture solution, and the reaction was maintained for 1 h. Finally, the as-prepared MNPs were washed with water and dried in an oven. The working MNP suspension was prepared by using 0.1500 g of dry MNPs in 10.0 mL of DI water.

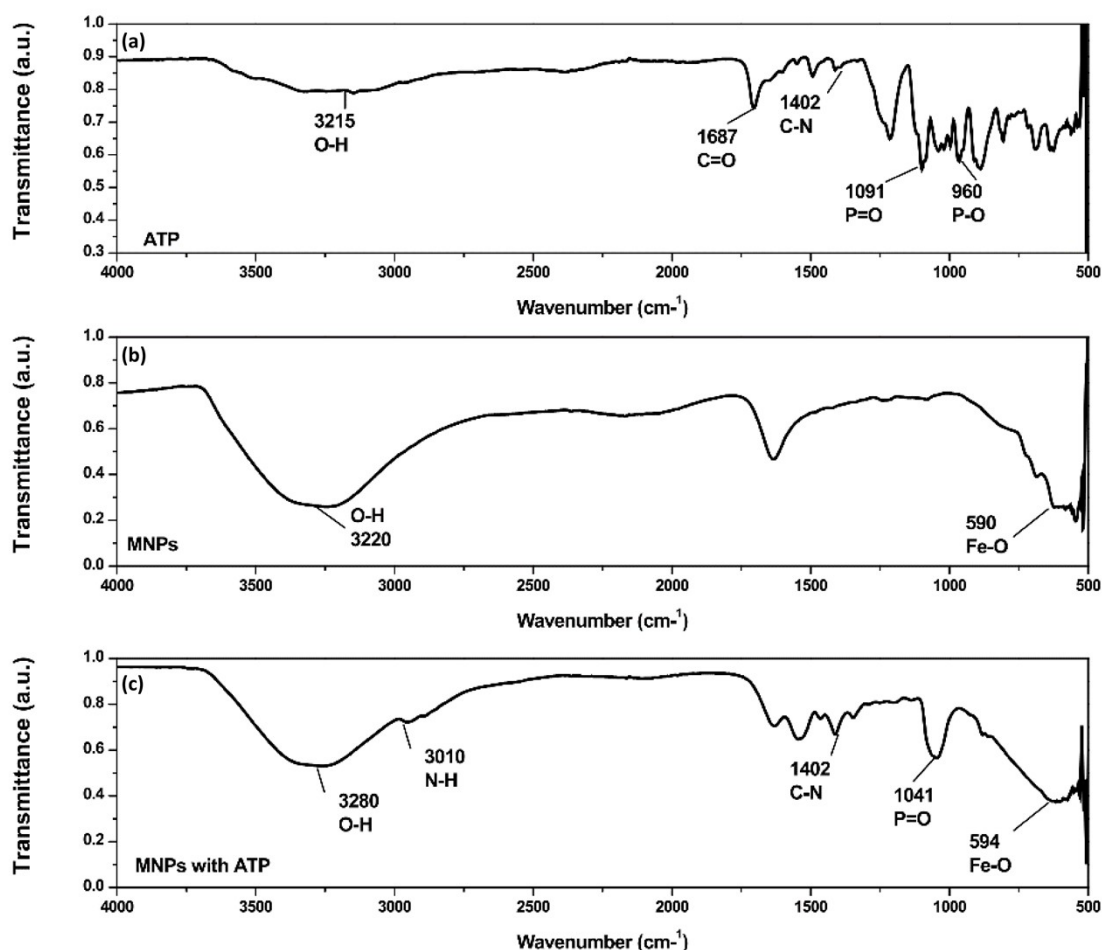

Fig. S1 FT-IR spectrum of (a) ATP, (b) MNPs and (c) MNPs+ATP

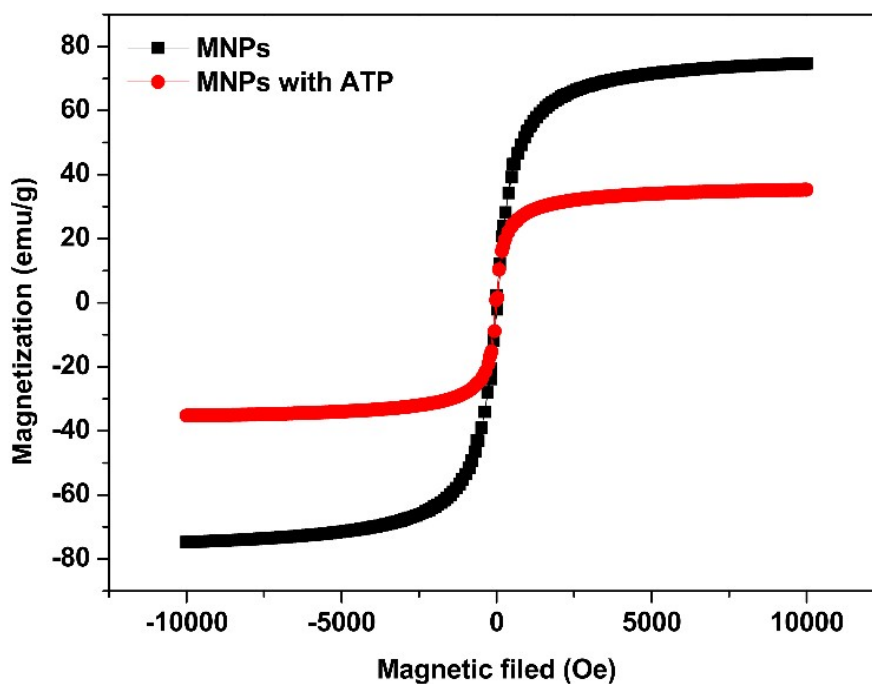

**Fig. S2** Magnetic field dependence of the magnetization of MNPs in the presence and absence of ATP

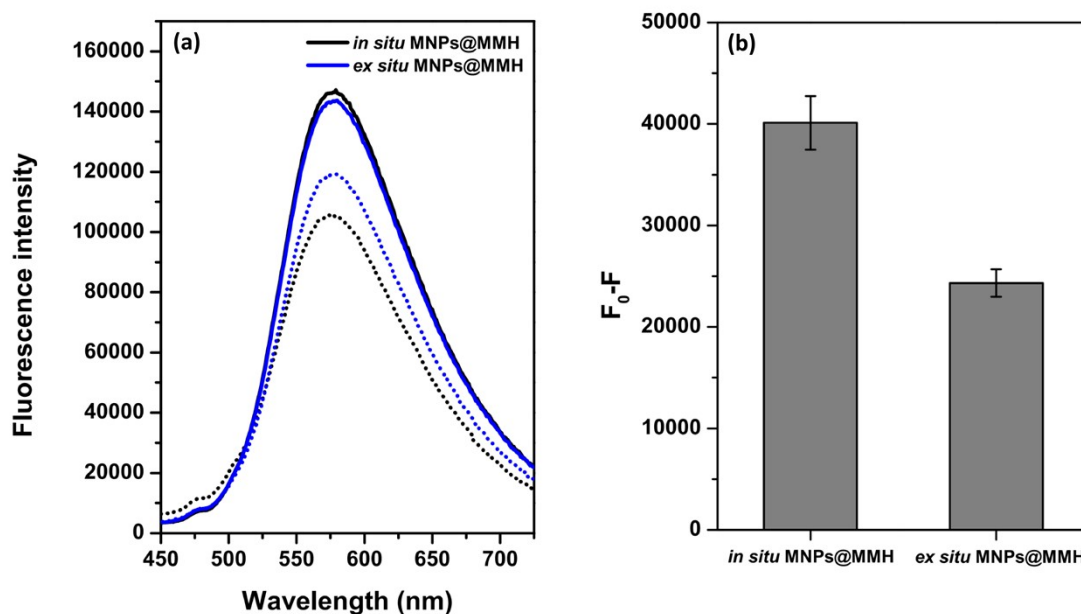

**Fig. S3** (a) Fluorescence spectra of DAP in 0.8 M Tris-HCl buffer pH 8.0 generated from the mixture of 200  $\mu\text{M}$  OPD and 200 mM  $\text{H}_2\text{O}_2$  using *in situ* and *ex situ* prepared MNPs@MMH in the absence (—) and presence (.....) of 10  $\mu\text{M}$  ATP (b) The corresponding degree of fluorescence decreasing ( $F_0-F$ ) after adding 10  $\mu\text{M}$  ATP. Fluorescence measurements were performed with a fluorescence spectrometer (Edinburgh Analytical Instruments, FS5).
